# Supplementary material for: Azacitidine or intensive chemotherapy for older patients with secondary or therapy-related acute myeloid leukemia
Source: PubMed Central journal article supplement (PMC5668025; doi:10.18632/oncotarget.15988), 2017-03-07
Supplement: oncotarget-08-79126-s001.pdf [file oncotarget-08-79126-s001.pdf]

## Azacitidine or intensive chemotherapy for older patients with secondary or therapy-related acute myeloid leukemia

### Supplementary Materials

#### Assessment of safety and efficacy

Early death (ED) was defined as death that occurred during the first 30 days after diagnosis. Response was assessed according to the International Working Group (IWG) on acute myeloid leukemia (AML).<sup>1</sup> Bone marrow assessment in patients treated with intensive chemotherapy was performed after blood recovery or if recovery was delayed until days 35 to 45. In the azacitidine group, bone marrow aspiration was carried out after 3 to 6 cycles. Patients that harbored a stable or a progressive disease were classified as failures according to IWG-AML criteria. Patients with a stable disease, hematological improvement (HI) either on erythroid, neutrophil or platelet lineage, was assessed according to the 2006 IWG-MDS criteria.<sup>2</sup> Overall survival (OS) was defined as the time from diagnosis until death from any cause or the date of last contact.

1. Cheson BD, Bennett JM, Kopecky KJ, et al. Revised recommendations of the International Working Group for Diagnosis, Standardization of Response Criteria, Treatment Outcomes, and Reporting Standards for Therapeutic Trials in Acute Myeloid Leukemia. *J Clin Oncol* 15 Dec 2003;21(24):4642-469.

2. Cheson BD, Greenberg PL, Bennett JM, et al. Clinical application and proposal for modification of the International Working Group (IWG) response criteria in myelodysplasia. *Blood* 15 July 2006;108(2):419-425.

**Supplementary Table 1: Schema of induction chemotherapy and azacitidine**

|                                                                                                                                  |
|----------------------------------------------------------------------------------------------------------------------------------|
| <b>Induction chemotherapy</b>                                                                                                    |
| Cytarabine 200 mg/m <sup>2</sup> /d for 7 days + Daunorubicin 60 mg/m <sup>2</sup> /d for 3 days                                 |
| Cytarabine 100 mg/m <sup>2</sup> /d for 7 days + Idarubicin 8 mg/m <sup>2</sup> /d for 5 days                                    |
| Cytarabine 100 mg/m <sup>2</sup> /d for 7 days + Idarubicin 8 mg/m <sup>2</sup> /d for 5 days + L.200 mg/m <sup>2</sup> at day 1 |
| <b>Azacitidine</b>                                                                                                               |
| 75 mg/m <sup>2</sup> /d for 7 days on a 5 days on/2 days off/2 days on-basis every 28 days                                       |
| 75 mg/m <sup>2</sup> /d for 5 days every 28 days for the frailest patients                                                       |
| until disease progression, unacceptable toxicity, or patient decision to withdraw                                                |

**Supplementary Table 2: Univariate analysis of factors associated with early death**

|                            | N   | N Events | OR   | 95% CI       | p     |
|----------------------------|-----|----------|------|--------------|-------|
| <b>Age (years)</b>         |     |          |      |              |       |
| <70                        | 84  | 7        | 1    | -            | -     |
| ≥70                        | 112 | 9        | 0.96 | [0.34;2.69]  | 0.940 |
| <b>Sex</b>                 |     |          |      |              |       |
| Male                       | 115 | 11       | 1    | -            | -     |
| Female                     | 81  | 5        | 0.62 | [0.21;1.86]  | 0.397 |
| <b>Performance status</b>  |     |          |      |              |       |
| 0-1                        | 121 | 8        | 1    | -            | -     |
| 2-3                        | 49  | 2        | 0.6  | [0.12;2.94]  | 0.529 |
| <b>Ferritinemia (µg/L)</b> |     |          |      |              |       |
| <750                       | 55  | 2        | 1    | -            | -     |
| ≥750                       | 53  | 7        | 4.03 | [0.80;20.38] | 0.092 |
| <b>Serum albumin (g/L)</b> |     |          |      |              |       |
| <35                        | 32  | 3        | 1    | -            | -     |
| ≥35                        | 117 | 9        | 0.81 | [0.20;3.17]  | 0.757 |
| <b>WBC (G/L)</b>           |     |          |      |              |       |
| <15                        | 140 | 9        | 1    | -            | -     |
| ≥15                        | 54  | 6        | 1.82 | [0.62-5.38]  | 0.279 |
| <b>LDH (U/L)</b>           |     |          |      |              |       |
| Normal                     | 47  | 2        | 1    | -            | -     |
| Elevated <sup>a</sup>      | 121 | 10       | 2.03 | [0.43-9.62]  | 0.374 |
| <b>Subtype of sAML</b>     |     |          |      |              |       |
| MDS-related                | 67  | 10       | 1    | -            | -     |
| MPN-related                | 32  | 2        | 0.38 | [0.08;1.85]  | 0.230 |
| Therapy-related            | 82  | 2        | 0.14 | [0.03;0.68]  | 0.014 |
| <b>Cytogenetics</b>        |     |          |      |              |       |
| Intermediate               | 123 | 8        | 1    | -            | -     |
| Unfavorable /non monosomal | 46  | 5        | 1.75 | [0.54;5.66]  | 0.348 |
| Monosomal karyotype        | 25  | 2        | 1.25 | [0.25;6.27]  | 0.786 |
| <b>Treatment arm</b>       |     |          |      |              |       |
| Azacitidine                | 104 | 6        | 1    | -            | -     |
| Intensive chemotherapy     | 92  | 10       | 1.99 | [0.69;5.71]  | 0.200 |

sAML: secondary AML; MDS: Myelodysplastic syndrome, MPN: Myeloproliferative neoplasm, WBC: white blood cell count, OR: Odds ratio, CI: confidence interval, <sup>a</sup>. above the benchmark

**Supplementary Table 3: Univariate analysis of factors associated with response to treatment**

|                                   | <b>N</b> | <b>N Events</b> | <b>OR</b> | <b>95% CI</b> | <b>p</b> |
|-----------------------------------|----------|-----------------|-----------|---------------|----------|
| <b>Age as continuous variable</b> |          |                 |           |               |          |
| Interval of 5 years               | 199      | 79              | 0.88      | [0.84 ;0.92]  | <0.001   |
| <b>Sex</b>                        |          |                 |           |               |          |
| Male                              | 117      | 46              | 1         | -             | -        |
| Female                            | 82       | 33              | 1.04      | [0.58;1.85]   | 0.895    |
| <b>Performance status</b>         |          |                 |           |               |          |
| 0-1                               | 123      | 49              | 1         | -             | -        |
| 2-3                               | 49       | 22              | 1.23      | [0.63;2.40]   | 0.543    |
| <b>Ferritinemia (µg/L)</b>        |          |                 |           |               |          |
| <750                              | 55       | 26              | 1         | -             | -        |
| ≥750                              | 53       | 24              | 0.92      | [0.43;1.97]   | 0.836    |
| <b>Serum albumin (g/L)</b>        |          |                 |           |               |          |
| <35                               | 32       | 16              | 1         | -             | -        |
| ≥35                               | 118      | 48              | 0.69      | [0.31;1.50]   | 0.346    |
| <b>WBC (G/L)</b>                  |          |                 |           |               |          |
| <15                               | 143      | 46              | 1         | -             | -        |
| ≥15                               | 54       | 33              | 3.31      | [1.73;6.35]   | <0.001   |
| <b>LDH (U/L)</b>                  |          |                 |           |               |          |
| Normal                            | 48       | 21              | 1         | -             | -        |
| Elevated <sup>a</sup>             | 121      | 51              | 0.94      | [0.48;1.84]   | 0.849    |
| <b>Subtype of sAML</b>            |          |                 |           |               |          |
| MDS-related                       | 69       | 19              | 1         | -             | -        |
| MPN-related                       | 32       | 10              | 1.20      | [0.48;2.99]   | 0.701    |
| Therapy-related                   | 83       | 45              | 3.12      | [1.58;6.17]   | 0.001    |
| <b>Cytogenetics</b>               |          |                 |           |               |          |
| Intermediate                      | 126      | 57              | 1         | -             | -        |
| Unfavorable /non monosomal        | 46       | 16              | 0.65      | [0.32;1.30]   | 0.221    |
| Monosomal karyotype               | 25       | 5               | 0.30      | [0.11;0.86]   | 0.024    |
| <b>Treatment arm</b>              |          |                 |           |               |          |
| Azacitidine                       | 107      | 21              | 1         | -             | -        |
| Intensive chemotherapy            | 92       | 58              | 6.99      | [3.69;13.22]  | <0.001   |

sAML: secondary AML; MDS: Myelodysplastic syndrome, MPN: Myeloproliferative neoplasm, WBC: white blood cell count, OR: Odds ratio, CI: confidence interval, <sup>a</sup>. above the benchmark

**Supplementary Table 4: Univariate analysis of factors associated with overall survival**

|                            | N   | N Events | HR   | 95% CI      | p      |
|----------------------------|-----|----------|------|-------------|--------|
| <b>Age (years)</b>         |     |          |      |             |        |
| <70                        | 85  | 63       | 1    | -           | -      |
| ≥70                        | 114 | 102      | 1.14 | [0.83;1.56] | 0.415  |
| <b>Sex</b>                 |     |          |      |             |        |
| Male                       | 117 | 100      | 1    | -           | -      |
| Female                     | 82  | 65       | 0.90 | [0.66;1.23] | 0.503  |
| <b>Performance status</b>  |     |          |      |             |        |
| 0-1                        | 123 | 96       | 1    | -           | -      |
| 2-3                        | 49  | 43       | 1.46 | [1.01;2.10] | 0.043  |
| <b>Ferritinemia (µg/L)</b> |     |          |      |             |        |
| <750                       | 55  | 39       | 1    | -           | -      |
| ≥750                       | 53  | 45       | 1.74 | [1.13;2;68] | 0.012  |
| <b>Serum albumin (g/L)</b> |     |          |      |             |        |
| <35                        | 32  | 25       | 1    | -           | -      |
| ≥35                        | 118 | 98       | 1.00 | [0.64;1;55] | 0.995  |
| <b>WBC (G/L)</b>           |     |          |      |             |        |
| <15                        | 143 | 120      | 1    | -           | -      |
| ≥15                        | 54  | 43       | 1.07 | [0.75;1;52] | 0.713  |
| <b>LDH (U/L)</b>           |     |          |      |             |        |
| Normal                     | 48  | 37       | 1    | -           | -      |
| Elevated <sup>a</sup>      | 121 | 101      | 1.66 | [1.14;2;43] | 0.009  |
| <b>Subtype of sAML</b>     |     |          |      |             |        |
| MDS-related                | 69  | 54       | 1    | -           | -      |
| MPN-related                | 32  | 29       | 1.59 | [1.01;2;52] | 0.046  |
| Therapy-related            | 83  | 69       | 1.11 | [0.77;1.58] | 0.581  |
| <b>Cytogenetics</b>        |     |          |      |             |        |
| Intermediate               | 126 | 98       | 1    | -           | -      |
| Unfavorable /non monosomal | 46  | 43       | 2.52 | [1.72;3.69] | <0.001 |
| Monosomal karyotype        | 25  | 22       | 3.22 | [1.98;5.25] | <0.001 |
| <b>Allogeneic SCT</b>      |     |          |      |             |        |
| No                         | 171 | 143      | 1    | -           | -      |
| Yes                        | 9   | 4        | 0.38 | [0.14;1.02] | 0.054  |
| <b>Treatment arm</b>       |     |          |      |             |        |
| Azacitidine                | 107 | 94       | 1    | -           | -      |
| Intensive chemotherapy     | 92  | 71       | 0.98 | [0.72;1.34] | 0.901  |

sAML: secondary AML, SCT: stem cell transplant, MDS: Myelodysplastic syndrome, MPN: Myeloproliferative neoplasm, WBC: white blood cell count, HR: hazard ratio, CI: confidence interval, SCT: stem cell-transplantation, <sup>a</sup>. above the benchmark
